# Supplementary material for: Transplant and Recipient Factors in Prediction of Kidney Transplant Outcomes: A UK-Wide Paired Analysis
Source: J Clin Med. 2022 Apr 15;11(8):2222. doi: 10.3390/jcm11082222 (PMC9024822; doi:10.3390/jcm11082222)
Supplement: Supplementary file 1 [file jcm-11-02222-s001.zip › jcm-1687297-supplementary.pdf]

**Supplementary Table S1: pattern of missingness**

| <b>Variable</b>                      | <b>Overall missingness</b> | <b>Prolonged DGF, missing data</b> | <b>Prolonged DGF, data present</b> | <b>Significance (p-value)</b> |
|--------------------------------------|----------------------------|------------------------------------|------------------------------------|-------------------------------|
| <i>Donor age</i>                     | 0 (0)                      | -                                  | -                                  | -                             |
| <i>Donor sex</i>                     | 0 (0)                      | -                                  | -                                  | -                             |
| <i>Donor BMI</i>                     | 674 (2.8)                  | 67 (9.9)                           | 1043 (4.5)                         | <0.01                         |
| <i>Donor type</i>                    | 0 (0)                      | -                                  | -                                  | -                             |
| <i>Donor retrieval creatinine</i>    | 2080 (8.8)                 | 146 (7.0)                          | 964 (4.5)                          | <0.01                         |
| <i>Donor history of hypertension</i> | 855 (3.6)                  | 58 (6.7)                           | 1052 (4.6)                         | <0.01                         |
| <i>Donor history of diabetes</i>     | 611 (2.6)                  | 47 (7.7)                           | 1063 (4.6)                         | <0.01                         |
| <i>Donor history of smoking</i>      | 636 (2.7)                  | 48 (7.5)                           | 1062 (4.6)                         | <0.01                         |
| <i>HLA mismatch group</i>            | 1 (<0.1)                   | -                                  | -                                  | -                             |
| <i>Cold ischaemic time</i>           | 244 (1.0)                  | 14 (5.7)                           | 1096 (4.6)                         | 0.53                          |
| <i>Recipient age</i>                 | 0 (0)                      | -                                  | -                                  | -                             |
| <i>Recipient sex</i>                 | 12 (<0.1)                  | -                                  | -                                  | -                             |
| <i>Recipient BMI</i>                 | 9300 (39.2)                | 425 (4.6)                          | 685 (4.8)                          | 0.53                          |
| <i>Recipient dialysis modality</i>   | 100 (0.4)                  | -                                  | -                                  | -                             |
| <i>Recipient diabetes</i>            | 0 (0)                      | -                                  | -                                  | -                             |
| <i>Recipient wait-time</i>           | 32 (<0.1)                  | -                                  | -                                  | -                             |
| <i>Re-transplant</i>                 | 0 (0)                      | -                                  | -                                  | -                             |
| <i>Sensitisation</i>                 | 133 (0.5)                  | -                                  | -                                  | -                             |
| <i>Kidney side</i>                   | 0 (0)                      | -                                  | -                                  | -                             |
| <i>HLAi</i>                          | 0 (0)                      | -                                  | -                                  | -                             |

Variable names (left) are shown alongside percentage missingness for each variable (out of total of 23,700 transplants), and the conditional probability of prolonged DGF given that that variable is observed and not observed. This is shown as the number and percentage of cases of prolonged DGF where that variable was missing, the number and percentage of cases of prolonged DGF where that variable was observed, and the significance of this difference. Differences in prolonged DGF between cases where data was observed vs missing were examined for variables where missing data amounted to greater than 1%.

Supplementary Table S2: demographic details for entire cohort

| <b>Variable</b>                                      | <b>Values</b> |
|------------------------------------------------------|---------------|
| <i>n</i>                                             | 23,700        |
| <i>Donor age, years, mean (sd)</i>                   | 50.05 (14.80) |
| <i>Donor sex, male (%)</i>                           | 12,737 (53.7) |
| <i>Donor BMI, units, mean (sd)</i>                   | 26.71 (5.22)  |
| <i>Donor type, DCD (%)</i>                           | 7563 (31.9)   |
| <i>Donor retrieval creatinine, mmol/L, mean (sd)</i> | 85.38 (50.43) |
| <i>HLA mismatch group, n (%)</i>                     |               |
| 1                                                    | 2993 (12.6)   |
| 2                                                    | 8621 (36.4)   |
| 3                                                    | 10409 (43.9)  |
| 4                                                    | 1676 (7.1)    |
| <i>Cold ischaemic time, hours, mean (sd)</i>         | 16.29 (5.90)  |
| <i>Recipient age, years, mean (sd)</i>               | 50.45 (13.27) |
| <i>Recipient sex, n (%)</i>                          | 14,913 (63.0) |
| <i>Recipient BMI, units, mean (sd)</i>               | 26.62 (4.77)  |
| <i>Recipient dialysis modality, n (%)</i>            |               |
| HD                                                   | 14,954 (63.4) |
| PD                                                   | 6108 (25.9)   |
| Predialysis                                          | 2538 (10.8)   |
| <i>Recipient diabetes, n (%)</i>                     | 2056 (8.7)    |
| <i>Recipient wait-time, years, mean (%)</i>          | 2.67 (2.41)   |
| <i>Re-transplant, n (%)</i>                          | 3273 (13.8)   |
| <i>Highly sensitised, n (%)</i>                      | 1882 (8.0)    |
| <i>Kidney side, right, n (%)</i>                     | 11,841 (50.0) |
| <i>HLAi, n (%)</i>                                   | 205 (0.9)     |

### Supplementary Table S3: Multivariate Analysis – Odds of prolonged DGF (mismatch number)

| <i><b>Parameter</b></i>                    | <b>Odds ratio<br/>(95% CI)</b> | <b>p-value for the<br/>difference</b> |
|--------------------------------------------|--------------------------------|---------------------------------------|
| <i>Number of HLA mismatches</i>            | 1.25                           | 0.003                                 |
| <i>Cold Ischaemia Time (hours)</i>         | 1.07                           | 0.0000006                             |
| <i>Waitlist time (years)</i>               | 1.11                           | 0.01                                  |
| <i>Recipient age (years)</i>               | 1.01                           | 0.26                                  |
| <i>Recipient sex (male)</i>                | 1.16                           | 0.27                                  |
| <i>Recipient BMI (units)</i>               | 1.03                           | 0.04                                  |
| <i>Recipient dialysis type (PD)</i>        | 0.54                           | 0.00001                               |
| <i>Recipient diabetes</i>                  | 1.59                           | 0.03                                  |
| <i>Recipient previous renal transplant</i> | 2.33                           | 0.0002                                |
| <i>Recipient rejection within 14 days</i>  | 2.31                           | 0.00008                               |
| <i>Recipient highly sensitised</i>         | 1.34                           | 0.34                                  |
| <i>Donor organ side (right)</i>            | 1.06                           | 0.52                                  |
| <i>HLA incompatible transplant</i>         | 3.31                           | 0.07                                  |

Alternative table 2, where total number of HLA mismatches was considered as opposed to HLA mismatch group.

### Supplementary Table S4: paired DGF duration analysis (longer vs shorter)

| <i>Parameter</i>                           | <b>Odds ratio<br/>(95% CI)</b> | <b>p-value for the<br/>difference</b> |
|--------------------------------------------|--------------------------------|---------------------------------------|
| <i>Number of HLA mismatches</i>            | 1.08                           | 0.01                                  |
| <i>Cold Ischaemia Time (hours)</i>         | 1.03                           | <0.0001                               |
| <i>Waitlist time (years)</i>               | 1.06                           | <0.0001                               |
| <i>Recipient age (years)</i>               | 0.99                           | 0.02                                  |
| <i>Recipient sex (male)</i>                | 1.09                           | 0.14                                  |
| <i>Recipient BMI (units)</i>               | 1.01                           | 0.09                                  |
| <i>Recipient dialysis type (PD)</i>        | 0.54                           | <0.0001                               |
| <i>Recipient diabetes</i>                  | 1.22                           | 0.04                                  |
| <i>Recipient previous renal transplant</i> | 1.47                           | <0.0001                               |
| <i>Recipient rejection within 14 days</i>  | 1.77                           | <0.0001                               |
| <i>Recipient highly sensitised</i>         | 1.03                           | 0.82                                  |
| <i>Donor organ side (right)</i>            | 1.08                           | 0.06                                  |
| <i>HLA incompatible transplant</i>         | 1.98                           | 0.01                                  |

Alternative table 2, where the response variable was set as DGF duration (higher or lower) within each donor pair. Primary function was coded as DGF of duration 0 days. This analysis contains data from 6682 transplants where DGF duration was different within each kidney donor pair.

### Supplementary Table S5: NHSBT HLA mismatch grade definitions

| <b>Level</b> | <b>HLA mismatch summary</b>        | <b>HLA mismatch combinations included</b>                  |
|--------------|------------------------------------|------------------------------------------------------------|
| 1            | 000                                | 000                                                        |
| 2            | [0 DR and 0/1 B]                   | 100, 010, 110, 200, 210                                    |
| 3            | [0 DR and 2 B] or [1 DR and 0/1 B] | 020, 120, 220, 001, 101, 201, 011, 111, 211                |
| 4            | [1 DR and 2 B] or [2 DR]           | 021, 121, 221, 002, 102, 202, 012, 112, 212, 022, 122, 222 |

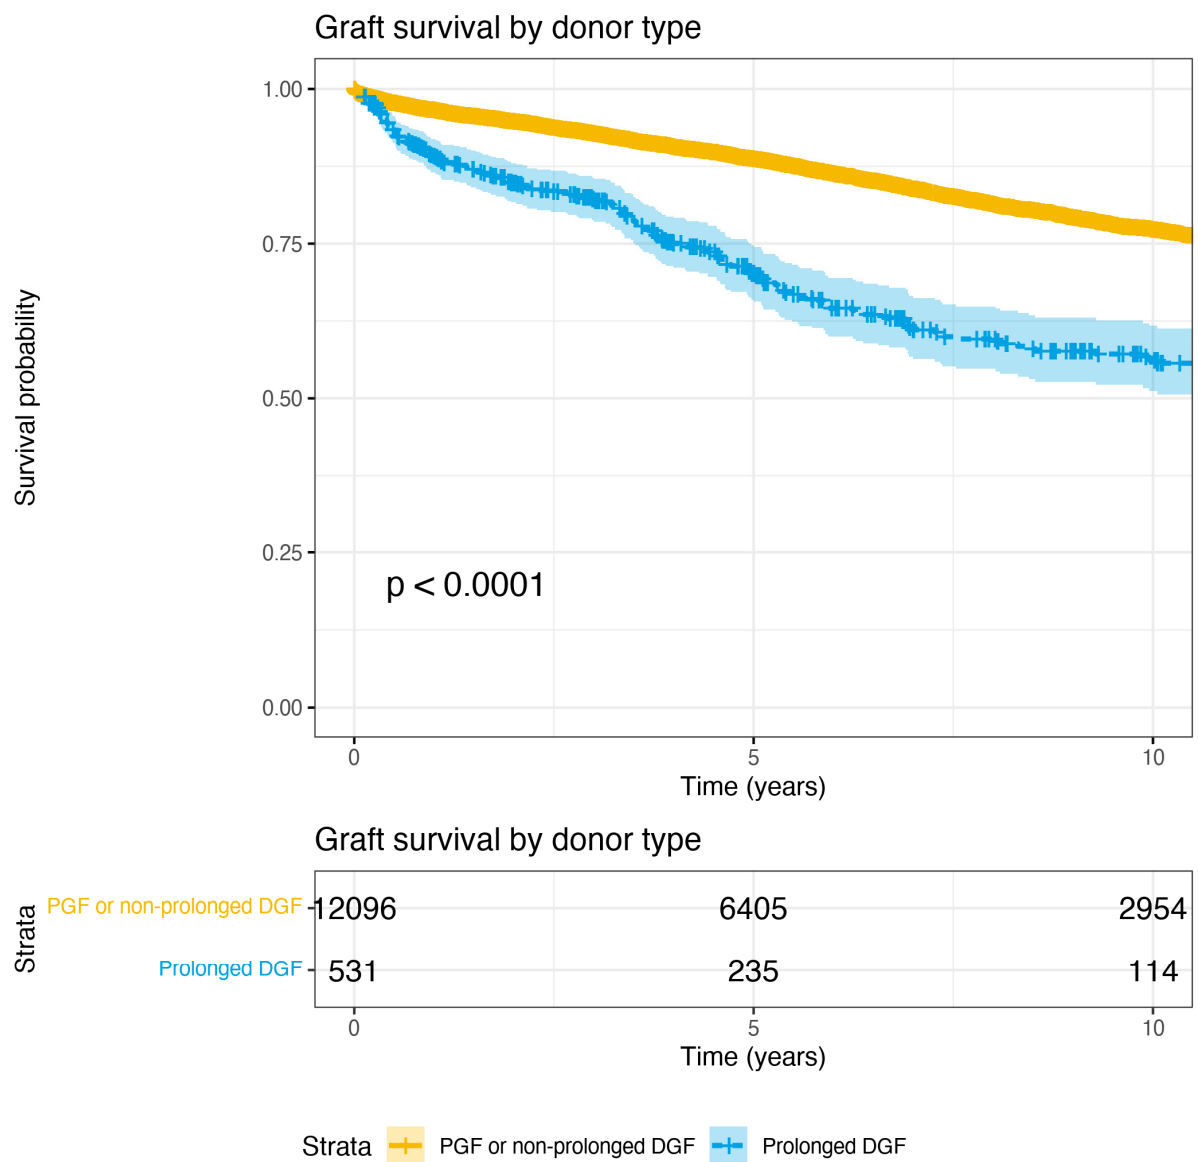

Supplementary Figure S1: Prolonged DGF and graft survival in the DBD cohort

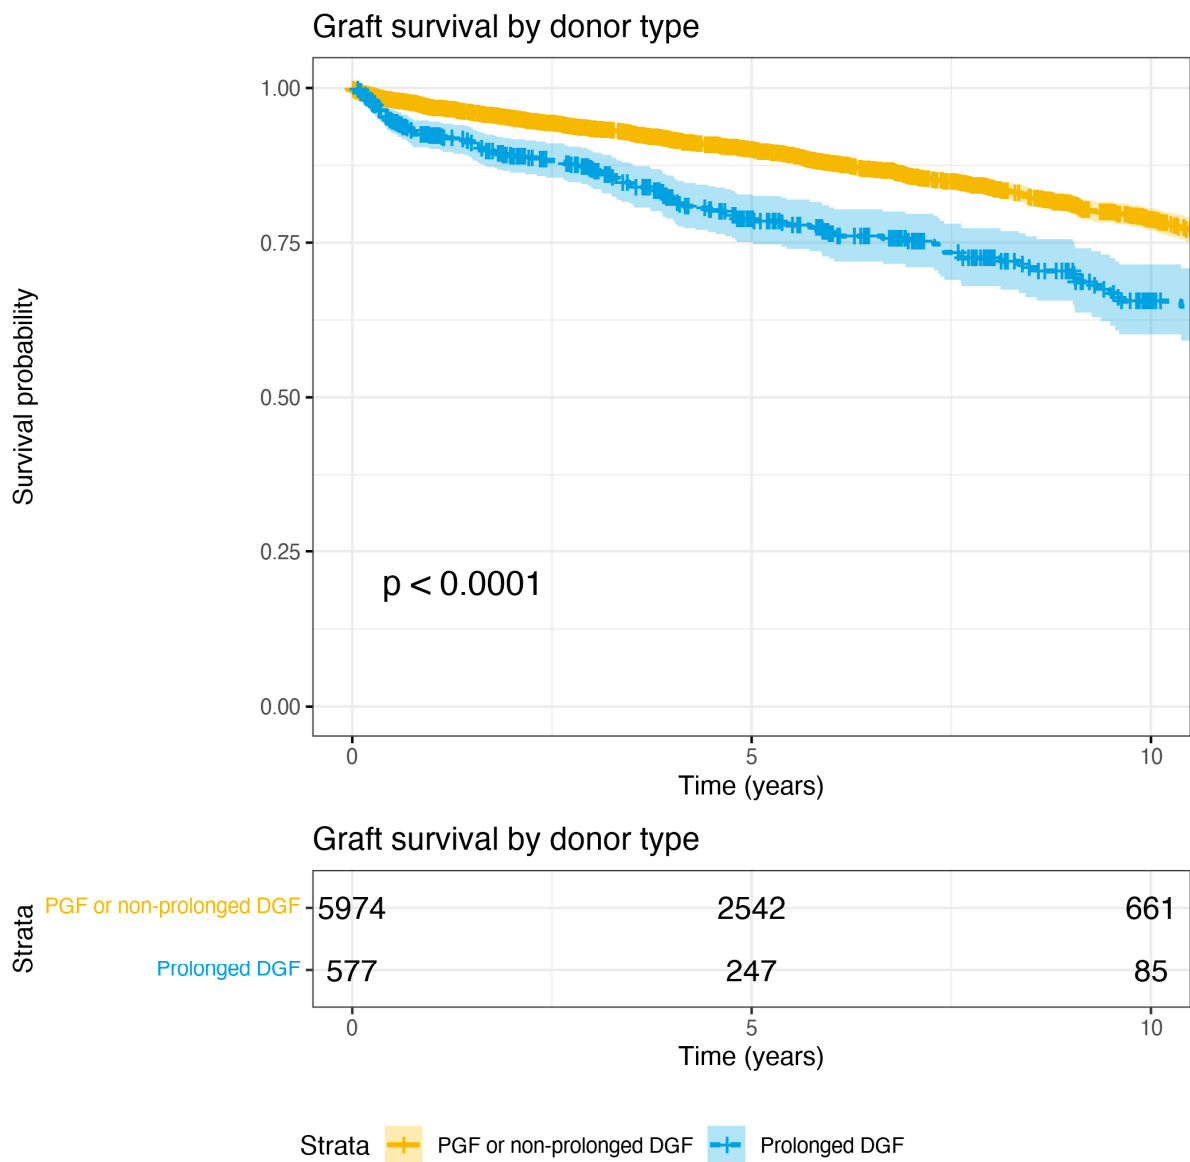

Supplementary Figure S2: Prolonged DGF and graft survival in the DCD cohort
